# Supplementary material for: Spatial localization of RNAs within the breast tumor microenvironment may affect progression and recurrence of DCIS
Source: Research Square preprint supplement (doi:10.21203/rs.3.rs-8787311/v1), 2026-02-24
Supplement: Supplementary file 1 [file 0181bea28fccae149dcad9e8.docx]

**Supplementary Information**

**Supplementary Table 1.** RNAScope panel probe and dye combinations.

| **Probe Cocktail** | **Channel 1 (C1)** | **Channel 2 (C2)** | **Channel 3 (C3)** | **Channel 4 (C4)** |
| --- | --- | --- | --- | --- |
| MRR | MANCR – Opal 690 | RUNX2 – Opal 650 | RUNX1 – Opal 570 | None |
| MTC | MANCR – Opal 690 | TP63 – Opal 650 | CXCL12 – Opal 570 | None |
| CCC | CD90 – Opal 690 | None | CXCL12 – Opal 650 | CXCR6 – Opal 570 |

**Supplementary Table 2.** Custom protein antibody panel for multiplex IHC

| **Target** | **Antibody** | **Catalog** | **Dilution** | **Opal Dye** |
| --- | --- | --- | --- | --- |
| CD3 | Leica LN10 | PA0122 | RTU | Opal 520 (1:100) |
| TP63 | Cell Signaling D9L7L | 39692S | 1:50 | Opal 540 (1:100) |
| CD34 | Leica QBEND/10 | PA0212 | RTU | Opal 620 (1:500) |
| α-Smooth Muscle Actin (α-SMA) | Leica ASM1 | PA0943 | RTU | Opal 650 (1:1000) |
| CD68 | Leica 514H12 | PA0273 | RTU | Opal 690 (1:100) |

RTU = Ready To Use

**Supplementary Table 3.** Means and Standard Deviations of RNA Expression by Analysis Region

|  | **RUNX1 Mean Positive Cell Percent** | **RUNX2 Mean Positive Cell Percent** | **MANCR (MRR) Mean Positive Cell Percent** | **MANCR (MTC) Mean Positive Cell Percent** | **TP63 Mean Positive Cell Percent** | **CXCL12 (MTC) Mean Positive Cell Percent** | **CXCL12 (CCC) Mean Positive Cell Percent** | **CD90 Mean Positive Cell Percent** | **CXCR6 Mean Positive Cell Percent** |
| --- | --- | --- | --- | --- | --- | --- | --- | --- | --- |
| Benign | 60.41 +/- 27.61 | 15.32 +/-14.98 | 7.53 +/- 6.96 | 17.23 +/- 11.87 | 36.16 +/- 22.02 | 18.39 +/- 14.13 | 1.78 +/- 4.21 | 5.66 +/- 10.08 | 1.16 +/- 2.27 |
| DCIS | 56.81 +/- 28.86 | 13.56 +/- 13.25 | 6.43 +/- 5.21 | 16.14 +/- 14.90 | 14.13 +/- 10.86 | 18.49 +/- 12.37 | 1.48 +/- 2.72 | 4.17 +/- 4.90 | 0.55 +/- 1.80 |
| Invasive | 51.64 +/- 24.89 | 12.123 +/- 10.59 | 6.07 +/- 6.54 | 14.40 +/- 11.26 | 4.92 +/- 3.70 | 16.60 +/- 14.17 | 1.19 +/- 3.02 | 5.44 +/- 5.94 | 1.98 +/- 2.55 |
| Normal Stroma | 17.99 +/- 14.59 | 9.34 +/- 8.65 | 6.13 +/- 5.20 | 15.56 +/- 10.23 | 6.38 +/- 5.75 | 62.94 +/- 18.10 | 20.41+16.26 | 12.61 +/- 13.68 | 1.72 +/- 2.33 |
| DCIS Stroma | 23.46 +/- 20.03 | 13.97 +/- 11.17 | 5.81 +/- 4.05 | 14.58 +/- 8.69 | 3.59 +/-2 2.64 | 46.42 +/- 16.83 | 7.91 +/- 9.02 | 14.01 +/- 15.03 | 1.11 +/- 1.46 |
| Invasive Stroma | 35.33 +/- 16.86 | 17.15 +/- 11.23 | 5.16 +/- 4.40 | 14.01 +/- 10.56 | 3.71 +/- 3.51 | 36.55 +/- 17.24 | 5.76 +/- 5.76 | 24.86 +/- 16.62 | 1.98 +/- 2.55 |

**Supplementary Table 4.** Means and Standard Deviations of Protein Marker Panel Expression by Analysis Region

|  | **aSMA Mean Positive Cell Percent** | **CD3 Mean Positive Cell Percent** | **CD34 Mean Positive Cell Percent** | **CD68 Mean Positive Cell Percent** | **TP63 Mean Positive Cell Percent** |
| --- | --- | --- | --- | --- | --- |
| Normal | 50.92 +/- 19.51 | 0.75 +/- 0.47 | 4.20 +/- 3.53 | 4.61 +/- 8.43 | 6.66 +/- 9.67 |
| DCIS | 67.00 +/- 22.25 | 1.24 +/- 1.11 | 3.87 +/- 5.15 | 12.15 +/- 21.25 | 3.67 +/- 2.68 |
| Invasive | 70.76 +/- 24.50 | 2.53 +/- 1.85 | 4.05 +/- 3.19 | 16.23 +/- 18.15 | 1.65 +/- 1.75 |
| Normal Stroma | 32.85 +/- 26.62 | 5.11 +/- 4.22 | 23.70 +/- 16.61 | 12.41 +/- 11.33 | 0 +/- 0 |
| DCIS Stroma | 57.45 +/- 24.63 | 8.40 +/- 5.42 | 13.02 +/- 12.78 | 11.42 +/- 8.96 | 0.58 +/- 0 |
| Invasive Stroma | 64.25 +/- 22.76 | 6.34 +/- 5.57 | 6.70 +/- 13.65 | 15.87 +/- 14.63 | 0.63 +/-0 |
